# Supplementary material
Source: PubMed Central journal article supplement (PMC4385767)
Supplement: SD3.pdf [file SD3.pdf]

SUPPLEMENTAL TABLE 1  
PROVIDE enrollment eligibility criteria

---

|                    |                                                                                                                                                                                                                                                                                                                                                                                                                                                                                                                                                                                                                                                                                                                                                                                   |
|--------------------|-----------------------------------------------------------------------------------------------------------------------------------------------------------------------------------------------------------------------------------------------------------------------------------------------------------------------------------------------------------------------------------------------------------------------------------------------------------------------------------------------------------------------------------------------------------------------------------------------------------------------------------------------------------------------------------------------------------------------------------------------------------------------------------|
| Inclusion criteria | <ul style="list-style-type: none"> <li>Mother willing to sign informed consent form</li> <li>Healthy infant aged 0–7 days old</li> <li>No obvious congenital abnormalities or birth defects</li> <li>No abnormal (frequency and consistency) stools since birth</li> <li>Stable household with no plans to leave the area for the next 1 year</li> </ul>                                                                                                                                                                                                                                                                                                                                                                                                                          |
| Exclusion criteria | <ul style="list-style-type: none"> <li>Parents are not willing to have child vaccinated at the icddr,b field clinic</li> <li>Parents are not willing to have child’s blood drawn</li> <li>Parents are planning to enroll child into another interventional clinical study during the period of this trial that could affect the outcomes of this study</li> <li>Mother not willing to have blood drawn and breast milk extracted</li> <li>Parents not willing to have field research assistant in home two times per week</li> <li>History of seizures or other apparent neurologic disorders</li> <li>Infant received any vaccines before start of study, except BCG</li> <li>Infant has any sibling currently or previously enrolled in this study, including a twin</li> </ul> |

---

BCG = bacille Calmette-Guerin vaccine for tuberculosis disease.

SUPPLEMENTAL TABLE 2  
Summary of PROVIDE study protocol and consent amendments

---

| Amendment number | Summary of key revisions                                                                                                                                                                                                                                                                                |
|------------------|---------------------------------------------------------------------------------------------------------------------------------------------------------------------------------------------------------------------------------------------------------------------------------------------------------|
| 1                | Prior to start of subject enrollment: clarifications related to study endpoints, eligibility criteria, randomization procedure, subject safety monitoring, and micronutrient and malnutrition assessments                                                                                               |
| 2                | Prior to start of study enrollment: modification of time points for oral rotavirus vaccination based on new literature                                                                                                                                                                                  |
| 3                | For subject safety, modifications to termination and stopping criteria and revision of the malnutrition management plan; addition of gestational age assessment and stool collections for fecal cytokines, and decreased time of urine collection for the L/M measure of environmental enteropathy (EE) |
| 4                | Addition of a Media Consent Form for interviewing and photographing                                                                                                                                                                                                                                     |
| 5                | Addition of assays and specimen collection for additional exploratory analyses, increased nutritional surveillance in year 2 of study participation, and revision to the vaccination schedule in conjunction with changes in the national Bangladesh Expanded Program on Immunizations (EPI) schedule   |
| 6                | Addition of cognitive function tests and maternal assessments for postnatal depression and general intelligence                                                                                                                                                                                         |
| 7                | Addition of hydrogen breath testing for the detection of small intestine bacterial overgrowth as an additional biomarker of EE                                                                                                                                                                          |

---
